# Supplementary material for: The effect of four-phonon interaction on phonon thermal conductivity of hexagonal VTe2and puckered pentagonal VTe2
Source: Royal Society of Chemistry journal article supplement (doi:10.1039/d3cp03218c), 2023-01-01
Supplement: d3cp03218c1.pdf [file d3cp03218c1.pdf]

## Supporting Information

### Effect of four-phonon interaction on phonon thermal conductivity of hexagonal VTe<sub>2</sub> and puckered pentagonal VTe<sub>2</sub>

Dan Jin,<sup>a</sup> Pan Zhang,<sup>a</sup> Zhixue Tian,<sup>b</sup> Zhenhua Zhang,<sup>c</sup> Youyuan Yuan,<sup>d</sup> Yong Liu<sup>a</sup>, Zhihong Lu<sup>c</sup> and Rui Xiong<sup>\*a</sup>

<sup>a</sup>*Key Laboratory of Artificial Micro- and Nano-structures of Ministry of Education, School of Physics and Technology, Wuhan University, Wuhan 430072, People's Republic of China*

<sup>b</sup>*Hebei Key Laboratory of Photophysics Research and Application, College of Physics, Hebei Normal University, Shijiazhuang, 050024, China*

<sup>c</sup>*School of Materials and Metallurgy, Wuhan University of Science and Technology, Wuhan 430081, People's Republic of China*

<sup>d</sup>*Wuhan Britain-China School, Wuhan 430030, People's Republic of China*

\* Corresponding author: [xiongri@whu.edu.cn](mailto:xiongri@whu.edu.cn)

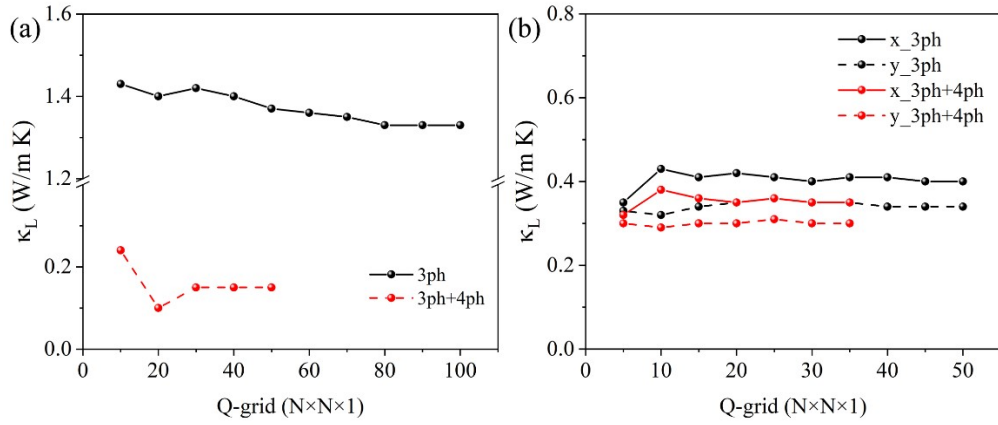

Fig. S1. Convergence tests of the Q-grid for (a) H-VTe<sub>2</sub> monolayer and (b) PP-VTe<sub>2</sub> monolayer.

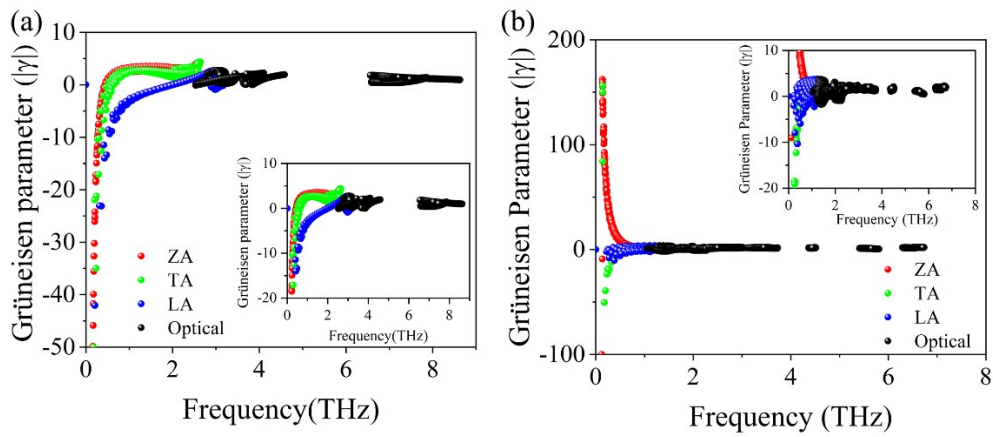

Fig. S2. Grüneisen parameter of (a) H-VTe<sub>2</sub> monolayer and (b) PP-VTe<sub>2</sub> monolayer.

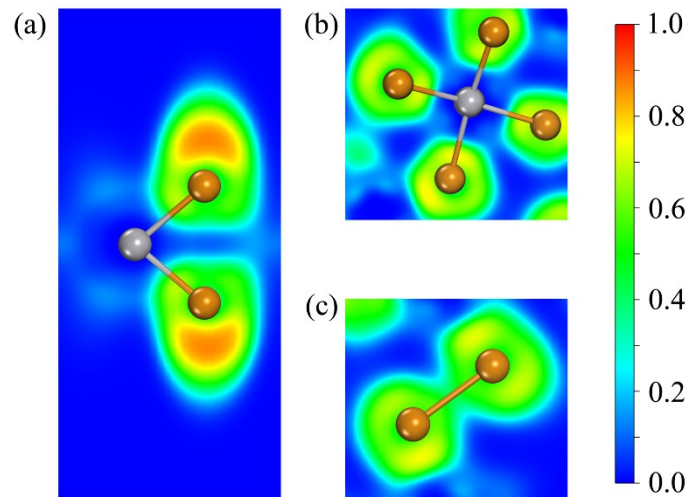

Fig. S3. Electron localization functions of (a) H-VTe<sub>2</sub> monolayer and (b-c) PP-VTe<sub>2</sub> monolayer.
